# Supplementary material for: Streptococcus pyogenes Φ1207.3 Is a Temperate Bacteriophage Carrying the Macrolide Resistance Gene Pair mef(A)-msr(D) and Capable of Lysogenizing Different Streptococci
Source: PubMed Central journal article supplement (PMC9927172; doi:10.1128/spectrum.04211-22), 2023-01-10
Supplement: spectrum.04211-22-s0001.pdf [file spectrum.04211-22-s0001.pdf]

**Table S1.** Oligonucleotide primers.

| Name  | Sequence (5' to 3')      | Target                                      | Amplified product           | GenBank ID: nucleotides   |
|-------|--------------------------|---------------------------------------------|-----------------------------|---------------------------|
| IF138 | CAGATCAAGAAATCAAACCTCCAA | Chromosomal <i>gyrB</i> gene, 5' end        | Chromosomal reference gene  | CP079923.1: 713301-713323 |
| IF139 | CAGCATCATCTACAGAAACTC    | Chromosomal <i>gyrB</i> gene, 3' end        |                             | CP079923.1: 713451-713471 |
| IF162 | TGATGATTATATAAATTGTGAGTT | End of $\phi$ 1207.3 genome, 5' end         | $\Phi$ 1207.3 episomal form | AY657002.1: 52363- 52386  |
| IF264 | CTTGCTCTCACTTATTATATT    | End of $\phi$ 1207.3 genome , 3' end        |                             | AY657002.1: 78-98         |
| IF285 | GGTCTTGTCTATGGCTTC       | Macrolide efflux <i>mef(A)</i> gene, 5' end | Phage reference gene        | AY657002.1: 3402-3419     |
| IF286 | CTAAAAGTGGCGTAACCG       | Macrolide efflux <i>mef(A)</i> gene, 3' end |                             | AY657002.1: 3644-3661     |

**Table S2.**  $\phi$ 1207.3 phage predicted structural proteins.

| ORF (aa)            | Predicted protein                      | Virfam homologous protein (identity) [E value/probability] | Pfam domains (aa) [E value]                          | Homologous protein ID / Origin (identity (%)) [E value]               |
|---------------------|----------------------------------------|------------------------------------------------------------|------------------------------------------------------|-----------------------------------------------------------------------|
| <i>orf38</i> (158)  | Phage terminase, small subunit         |                                                            | Phage terminase, small subunit (50-146) [7.3e-31]    |                                                                       |
| <i>orf39</i> (530)  | Phage terminase, large subunit         | D3 phage TermL (33%) [6e-77]                               | Phage Terminase (48-512) [8.9e-104]                  |                                                                       |
| <i>orf40</i> (413)  | Phage portal protein                   | $\phi$ 644-2 phage portal protein (39%) [100%]             | Phage portal protein (32-381) [4e-121]               |                                                                       |
| <i>orf41</i> (228)  | Clp protease                           |                                                            | Clp protease (13-177) [4.5e-40]                      |                                                                       |
| <i>orf42</i> (395)  | Phage capsid protein                   |                                                            | Phage capsid family (124-393) [3.7e-78]              |                                                                       |
| <i>orf43</i> (67)   | Phage adapter protein (Type 1)         | Bcep176 phage Ad1 (24%) [98.46%]                           |                                                      |                                                                       |
| <i>orf44</i> (109)  | Phage head-closure protein (Type 1)    | $\Phi$ 105 phage Hc1 (25%) [99.96%]                        | Phage head-tail joining protein (7-104) [7.4e-15]    |                                                                       |
| <i>orf45</i> (126)  | Phage neck protein (Type 1)            | Bv1 phage Ne1 (36%) [100%]                                 |                                                      |                                                                       |
| <i>orf46</i> (105)  | Phage tail-completion protein (Type 1) | Bv1 phage Tc1 (41%) [100%]                                 |                                                      |                                                                       |
| <i>orf47</i> (196)  | Major Tail Protein                     | bIL285 phage MTP (50%) [2e-48]                             |                                                      |                                                                       |
| <i>orf50</i> (1039) | Tail tape measure protein              |                                                            | Phage-related minor tail protein (311-531) [2.1e-14] | AAG32164.1 / <i>Lactococcus</i> phage TP901-1 (152/693 (22%)) [1e-22] |

| ORF (aa)           | Predicted protein        | Virfam homologous protein<br>(identity) [E value/probability] | Pfam domains<br>(aa) [E value]                                                                                                                                             | Homologous protein<br>ID / Origin<br>(identity (%)) [E value]               |
|--------------------|--------------------------|---------------------------------------------------------------|----------------------------------------------------------------------------------------------------------------------------------------------------------------------------|-----------------------------------------------------------------------------|
| <i>orf52</i> (967) | Host specificity protein |                                                               | Prophage endopeptidase tail N-terminal domain<br>(24-93) [1.8e-05]                                                                                                         | AAK83249 /<br><i>S. thermophilus</i> phage DT1.2<br>(113/418 (27%)) [5e-40] |
| <i>orf53</i> (760) | Phage structural protein |                                                               | Prophage endopeptidase tail<br>(108-332) [5.4e-10]<br><br>Siphovirus protein of unknown function (DUF859)<br>(1-512) [1.5e-214]<br><br>Holin family<br>(638-753) [3.3e-40] | 2FKK_A / <i>Escherichia</i> virus T4<br>(29/68 (43%)) [3e-06]               |
